# Supplementary material
Source: PubMed Central journal article supplement (PMC7238293)
Supplement: NIHMS1588155-supplement-Suppl__Figures.pdf [file NIHMS1588155-supplement-Suppl__Figures.pdf]

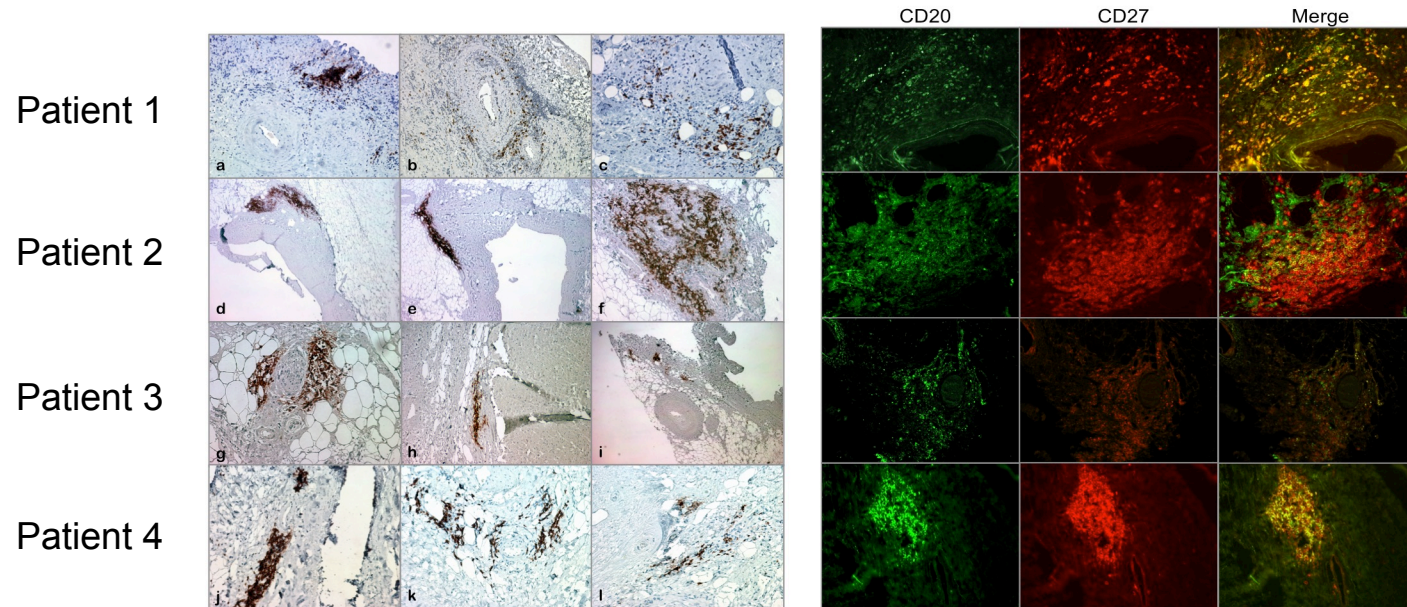

**Supplementary Figure 1.** Graft coronary arteries with allograft vasculopathy showing distinct patterns of B cell infiltrates. Left panels: Immunohistochemistry staining with CD20 showing B cell infiltrates as nodules or diffuse infiltrates around coronary arteries or adjacent tissue 20X (a–l). Right panels: Immunofluorescence staining with CD20 and CD27 showing the presence memory B cells in nodular or diffuse infiltrates by the co-expression of both markers. 10x.

**Supplementary Table 1.** Summary of new generation sequencing results

|           | <b>Heart Compartment</b> | <b>Total n° of sequences</b> | <b>Unique sequences</b> | <b>Clonality</b> |
|-----------|--------------------------|------------------------------|-------------------------|------------------|
| Patient 1 | PBMC                     | 425,558                      | 4,543                   | 0.05             |
|           | ENDO                     | 1,011,755                    | 3,282                   | 0.34             |
|           | LAD                      | 1,093,855                    | 4,268                   | 0.32             |
|           | RCA                      | 333,397                      | 1,996                   | 0.13             |
| Patient 2 | PBMC                     | 442,537                      | 4,706                   | 0.04             |
|           | LAD                      | 166,508                      | 4,107                   | 0.07             |
|           | RCA                      | 272,707                      | 6,492                   | 0.15             |
|           | CIRC                     | 285,398                      | 4,413                   | 0.13             |
| Patient 3 | PBMC                     | 958,891                      | 13,445                  | 0.03             |
|           | ENDO                     | 664,703                      | 8,379                   | 0.05             |
|           | LAD                      | 513                          | 19                      | 0.11             |
|           | RCA                      | 2,325                        | 10                      | 0.20             |
| Patient 4 | PBMC                     | 251,416                      | 6,709                   | 0.04             |
|           | ENDO                     | 82,935                       | 1,424                   | 0.15             |
|           | LAD                      | 470,331                      | 19,074                  | 0.06             |
|           | RCA                      | 160,186                      | 3,129                   | 0.06             |
|           | CIRC                     | 170,228                      | 3,157                   | 0.05             |
